# Supplementary material for: Molecular Genetics of Niemann–Pick Type C Disease in Italy: An Update on 105 Patients and Description of 18 NPC1 Novel Variants
Source: MDPI journal article supplement (doi:10.3390/jcm9030679), 2020-03-03
Supplement: s1 [file s1]

Supplementary Figure 1

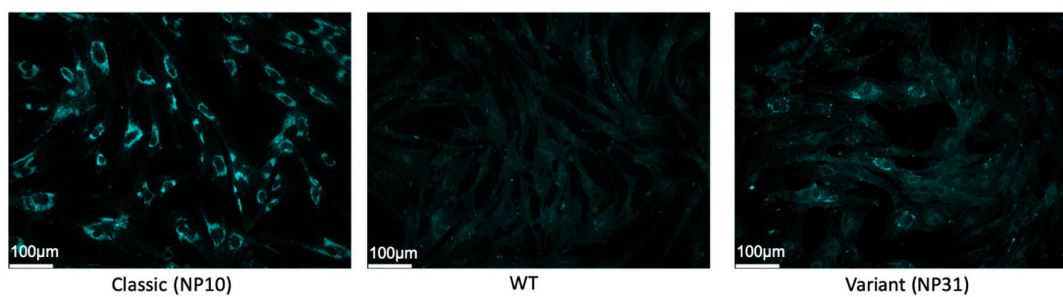

**Figure S1.** Representative filipin staining of human skin fibroblasts of a normal control and patients showing a classic (NP10) and variant (NP31) pattern of unesterified cholesterol accumulation within the lysosomes.
